# Supplementary material
Source: Springer Nature journal article supplement (https://www.springermedizin.de/resource/supplementary/13075_2013_4258_MOESM3_ESM.pdf/9696210)

**A**

Number of HMVECs migrated /3hpfs (400x)

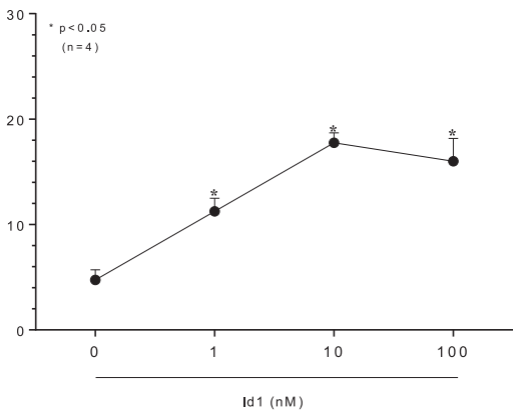**B**

Number of HMVECs migrated /3hpfs (400x)

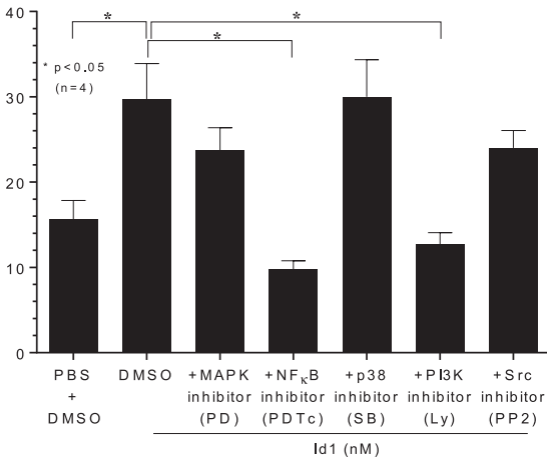

Supplement: MOESM3 [file 9696210]
